# Supplementary material
Source: publisher figshare collection journal article supplement (https://aacr.figshare.com/articles/dataset/_/22431630)

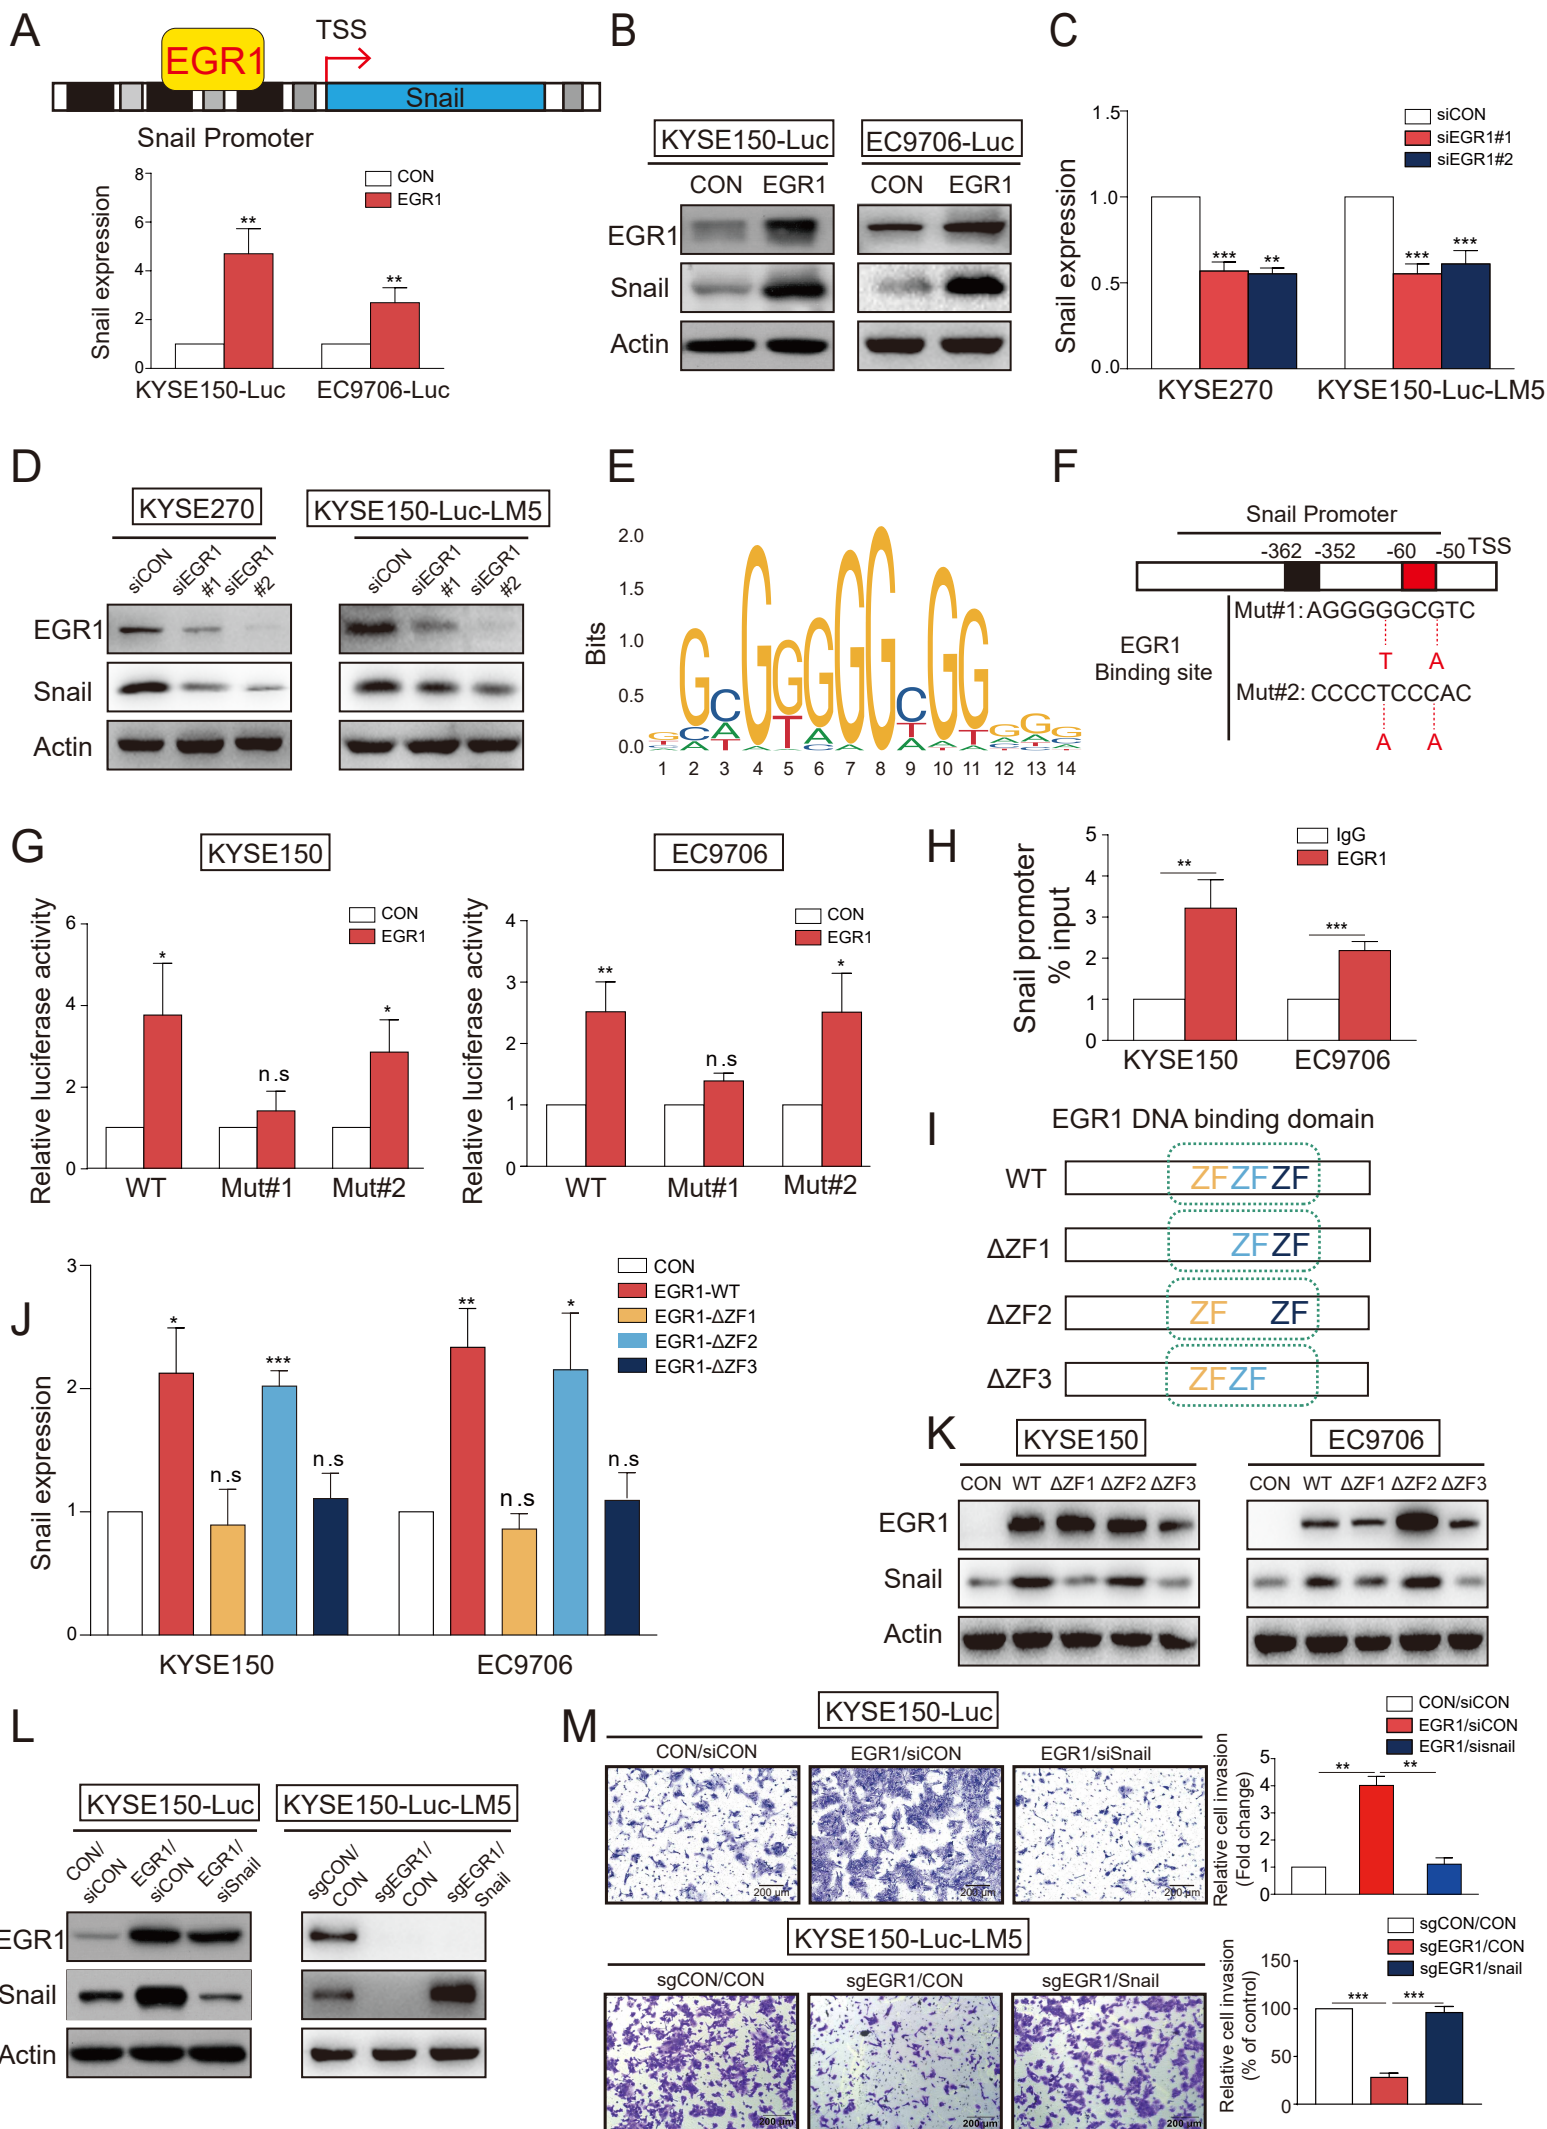

Supplementary Figure 5

Supplement: Supplementary file 1 [file 39877992]
